# Supplementary material
Source: MDPI journal article supplement (https://www.mdpi.com/2504-3900/78/1/60)
Supplement: s1 [file s1]

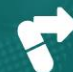

# Biological studies on cyclodextrins

**Ferenc Fenyvesi** <sup>1,\*</sup>

<sup>1</sup> Department of Pharmaceutical Technology, Faculty of Pharmacy, University of Debrecen, Nagyerdei St. 98, H-4032 Debrecen, Hungary

\* Corresponding author: [fenyvesi.ferenc@pharm.unideb.hu](mailto:fenyvesi.ferenc@pharm.unideb.hu)

**Abstract:** In recent years, our knowledge of the biological effects of cyclodextrins has grown significantly. Cellular actions of cyclodextrins originate in their ability to form complexes with lipophilic biomolecules. Cyclodextrins can target different types of molecules according to their size, for instance, alpha-cyclodextrins form complexes with phospholipids, while beta-cyclodextrins can bind cholesterol or prostaglandin E2. Due to their interactions with the main membrane constituents, cyclodextrins can affect the barrier function of biological barriers or influence the function of membrane proteins. Nevertheless, cyclodextrins can enter the cells by endocytosis and affect the intracellular cholesterol storage. Based on these findings, 2-hydroxypropyl-beta cyclodextrin (HPBCD) received the orphan designation for the treatment of Niemann-Pick disease, type C. The endocytosis of cyclodextrins works in different cell types and can be applied in the delivery of drugs into the cells. Tissue distribution and pharmacokinetics of cyclodextrins could be further characterized by imaging techniques. Radiolabeled HPBCD and randomly methylated beta-cyclodextrin (RAMEB) were used to study their in vivo behavior by positron emission tomography recently. Interestingly RAMEB accumulation was detected in prostaglandin E2 (PGE2) positive tumors. These findings can promote further research and application of cyclodextrins in inflammation and tumor diagnosis or targeting. The presentation aims to give an overview of the main biological effects of cyclodextrins and the recent results of this research field.

**Keywords:** cyclodextrins, cellular effects, biological barriers, endocytosis, cholesterol

# Cyclodextrins

Host-guest interactions

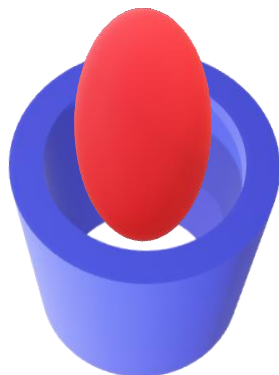

$\beta$ -cyclodextrin + cholesterol

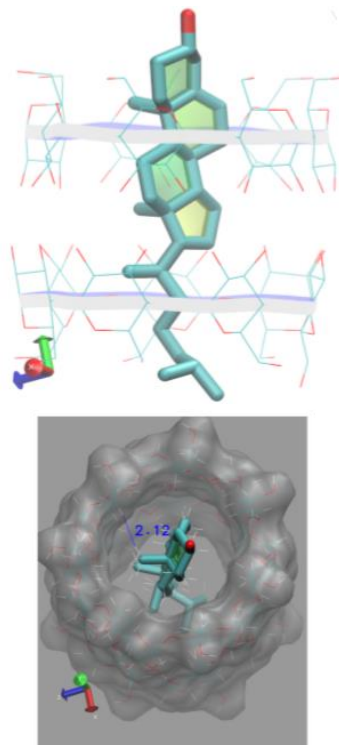

Beilstein J. Org. Chem. 2018, 14, 838-848.

IECP  
2020

# Cyclodextrin – cell membrane interactions

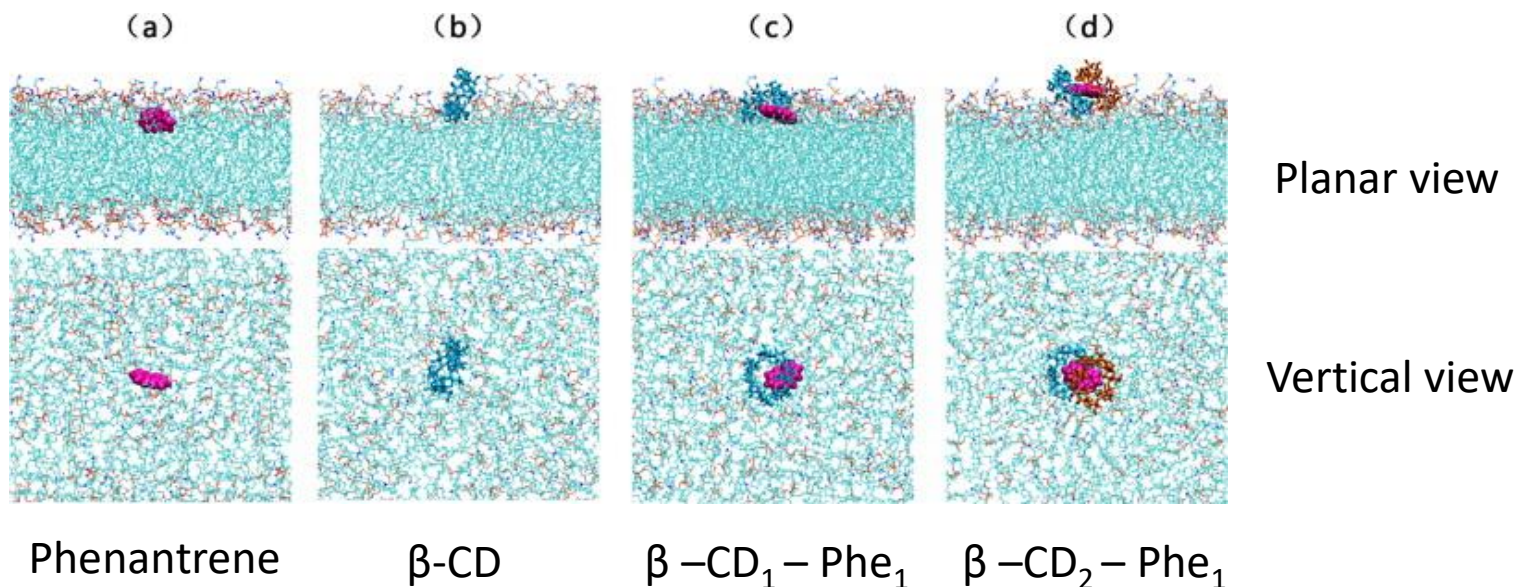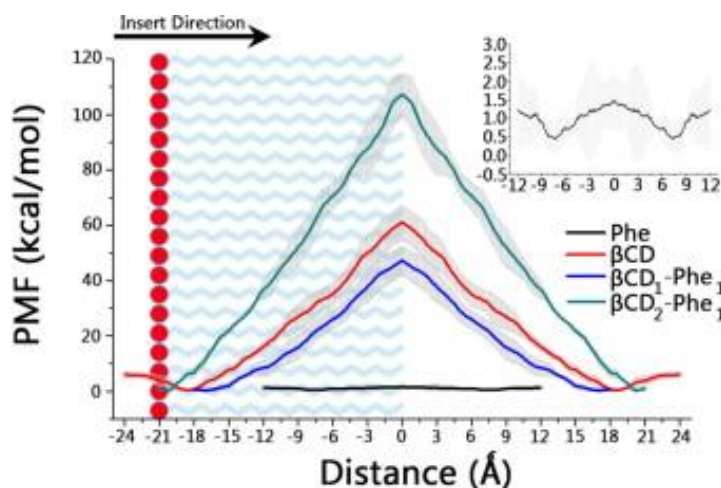

Phe – no energy barrier  
 $\beta$ -CD – high energy barrier



# 1. *In vitro* biological studies

Examination of  $\beta$ -cyclodextrin derivatives on cells

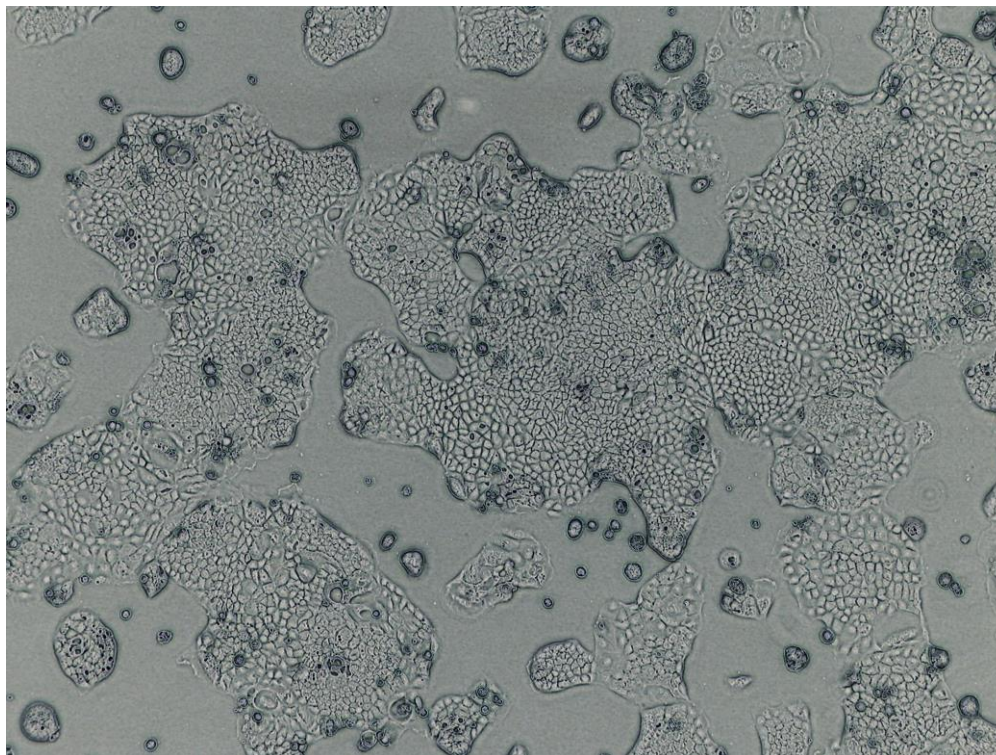

# Cyclodextrin – cell membrane interactions

## Cellular effects of $\beta$ -cyclodextrins - Cytotoxicity

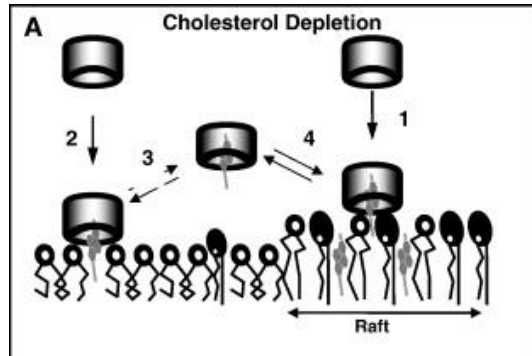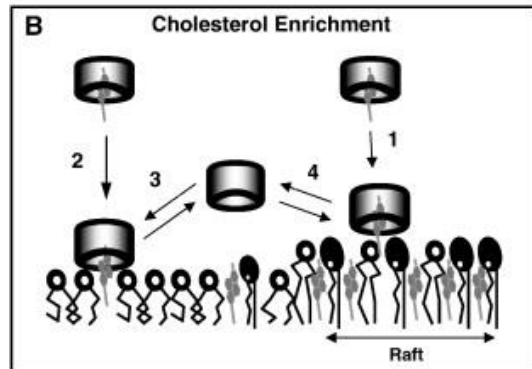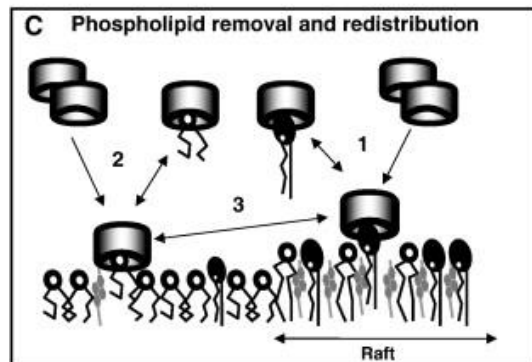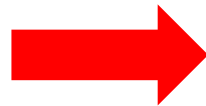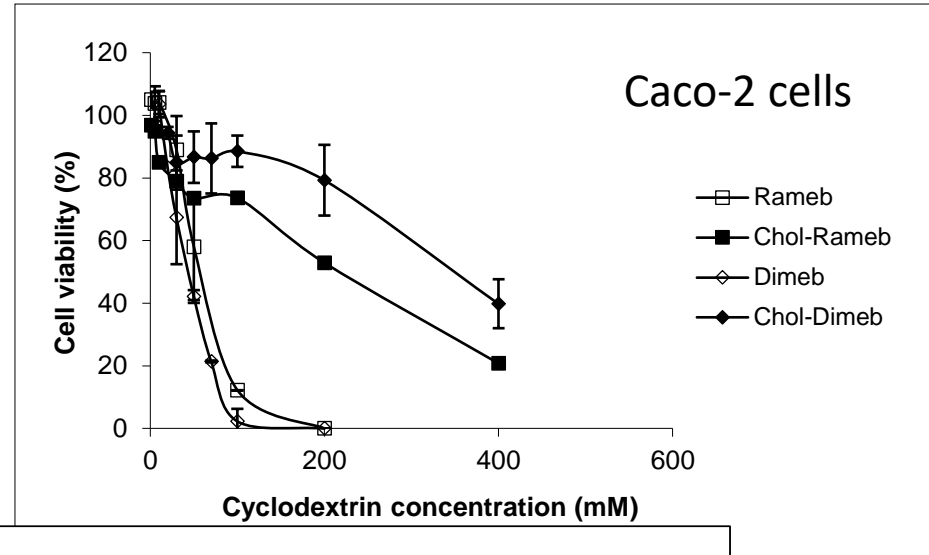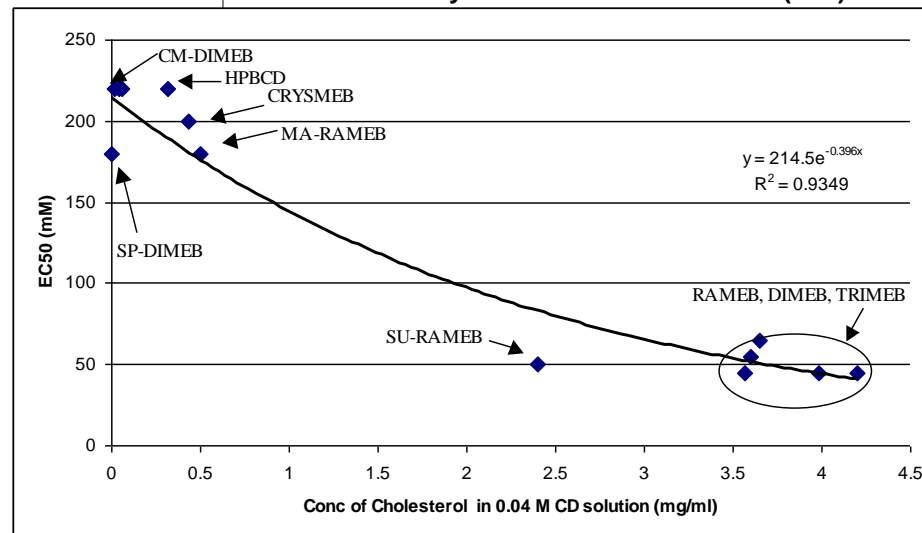

Kiss, T., Fenyvesi F., et al., European Journal of Pharmaceutical Sciences, 2010, 40,(4): 376-380

**IECP**  
**2020**

# Cyclodextrin – cell membrane interactions

## Cellular effects of $\beta$ -cyclodextrins – Tight Junctions

Caco-2 monolayers

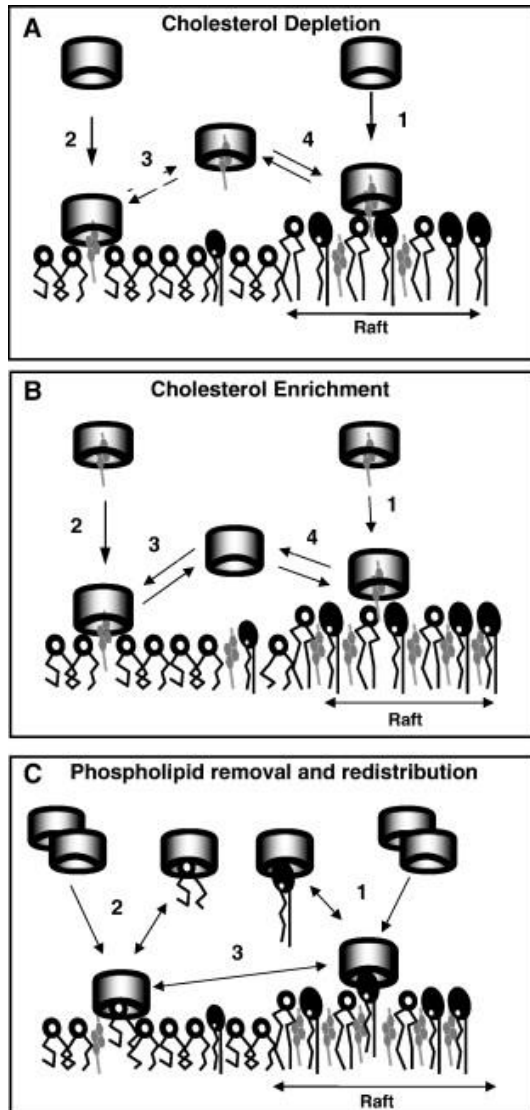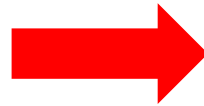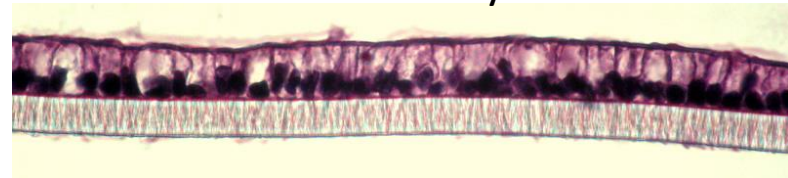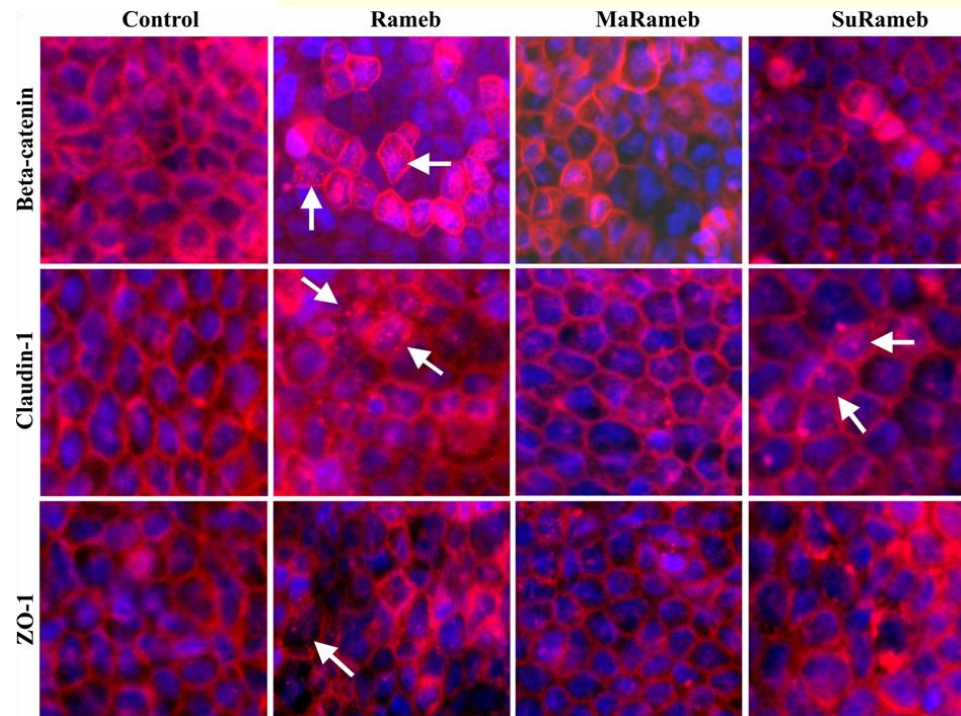

Fenyvesi F et. al., J Pharm Sci. 2011;100(11):4734-44

**IECP**  
**2020**



# Cyclodextrin – cell membrane interactions - Endocytosis

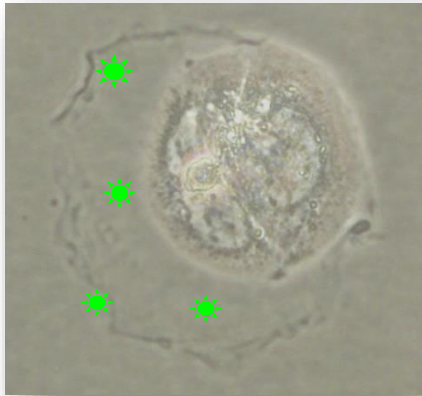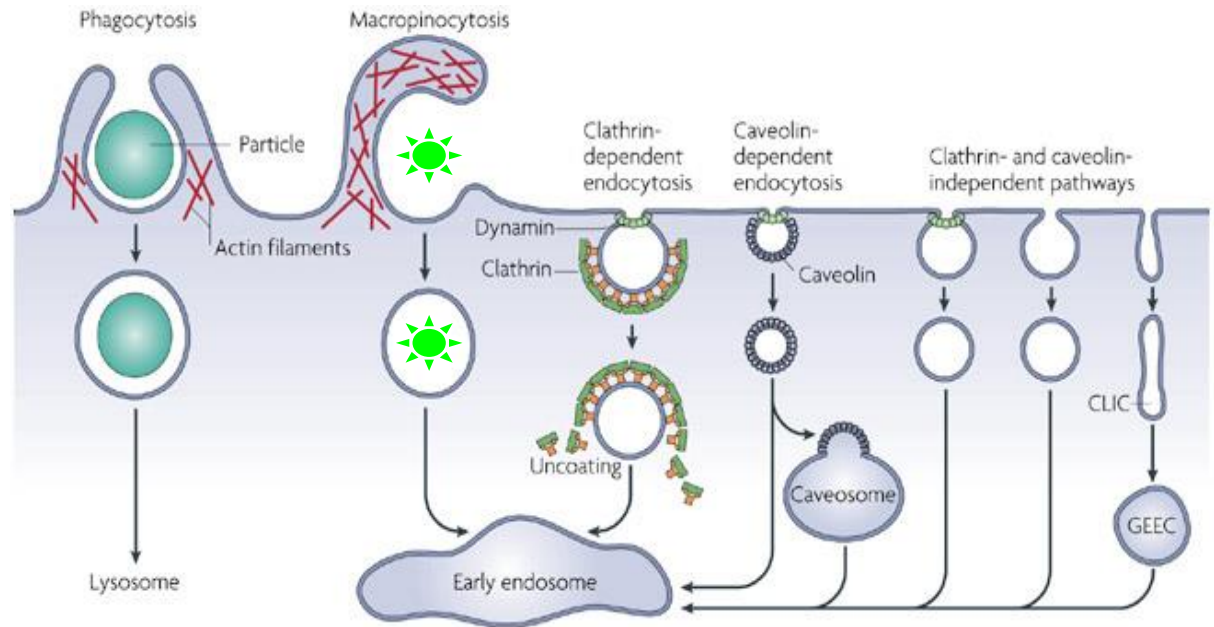

Nature Reviews | Molecular Cell Biology

Lopez, S. & Arias, C. (2010) How Viruses Hijack Endocytic Machinery. *Nature Education* 3(9):16

**IECP**  
**2020**



# Cyclodextrins enter the cytoplasm

Niemann-Pick disease type C :  
Lysosomal cholesterol storage disorder

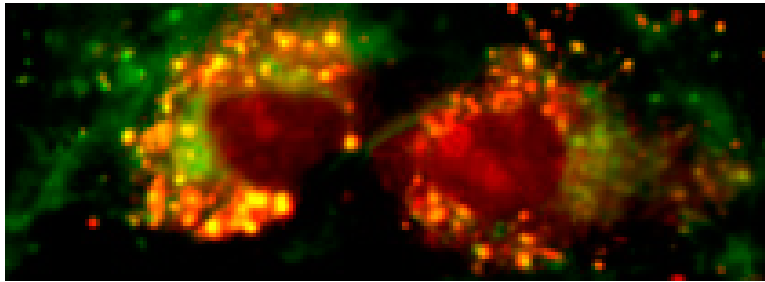

Rosenbaum et al. 2009. PNAS  
Endocytosis of beta-cyclodextrins is responsible for  
cholesterol reduction in Niemann-Pick type C mutant cells

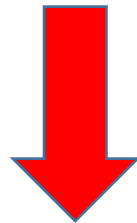

Application of hydroxypropyl-beta-cyclodextrin in the  
treatment of Niemann-Pick disease type C  
as an orphan drug

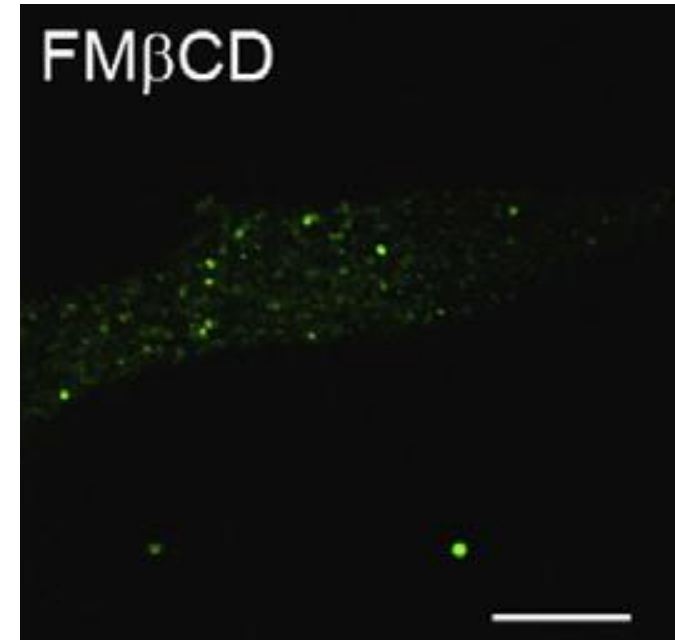

Plazzo et al. 2012. Chemistry and Physics of lipids  
Uptake of a fluorescent methyl-β-cyclodextrin  
via clathrin-dependent endocytosis

IECP  
2020

# Lysosomal-specific cholesterol reduction by Polyrotaxanes

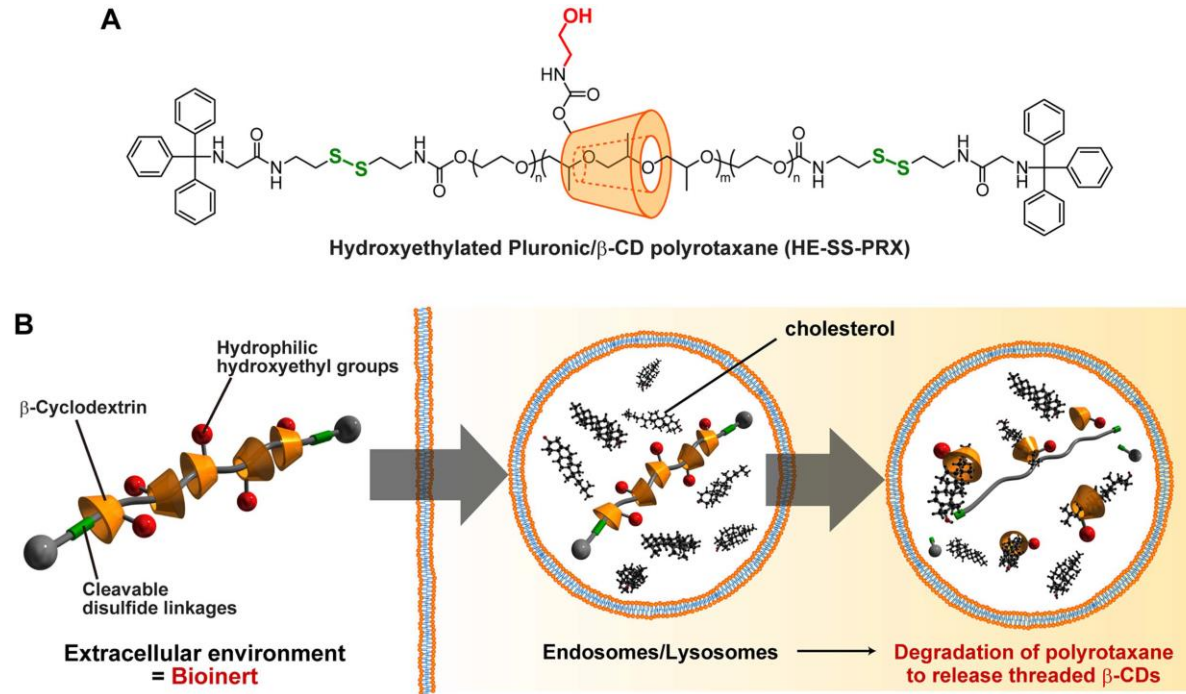

Tamura A. and Yui N., Scientific Reports, 2014, 4:4356.

Cyclodextrins can act from inside the lysosomes.

Are cyclodextrins able to reach the cytoplasm of other cell types?

# Fluorescent cyclodextrins in the cytoplasm of Caco-2 cells

50  $\mu$ M, 30 min, 37  $^{\circ}$ C

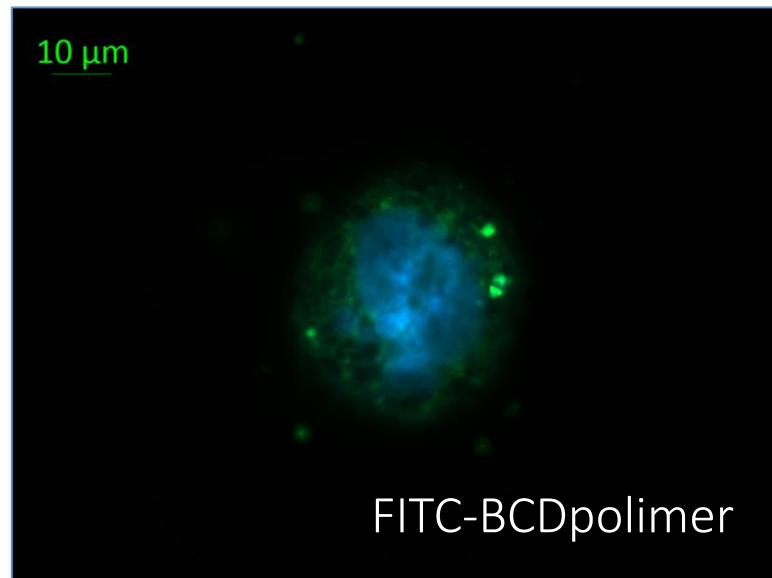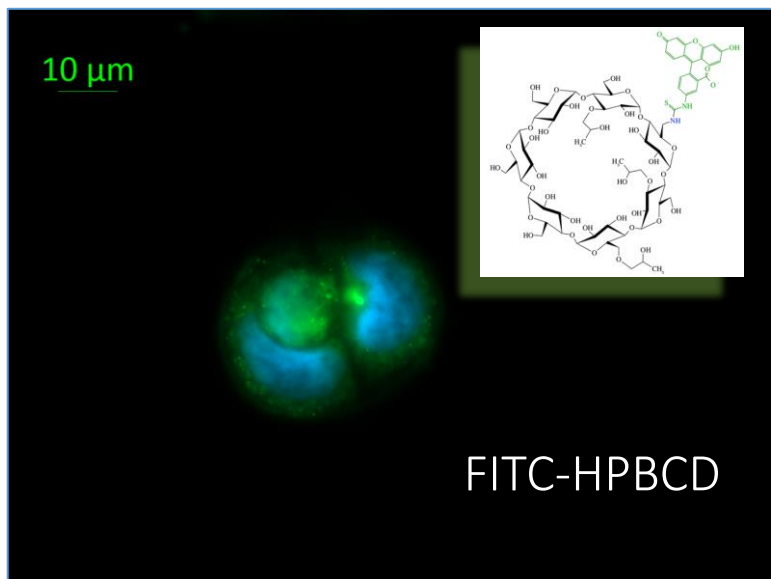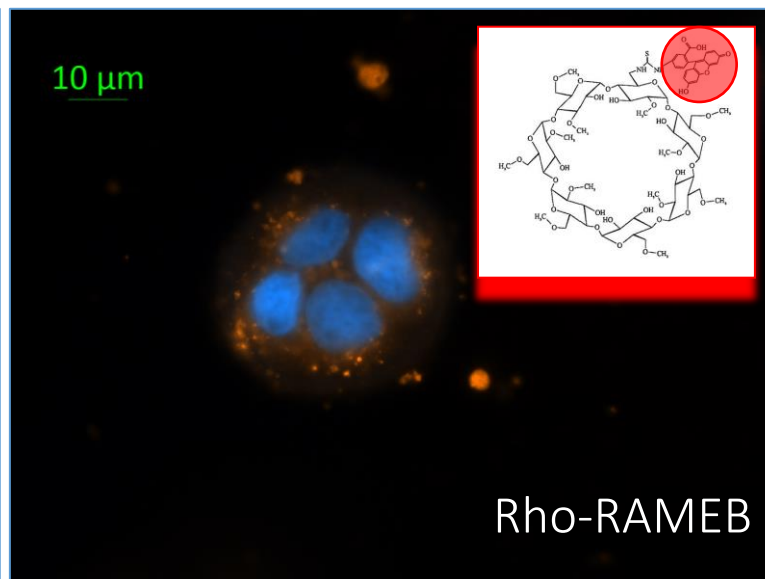

IECP  
2020



# Intracellular FITC-RAMEB accumulation in Caco-2 cells

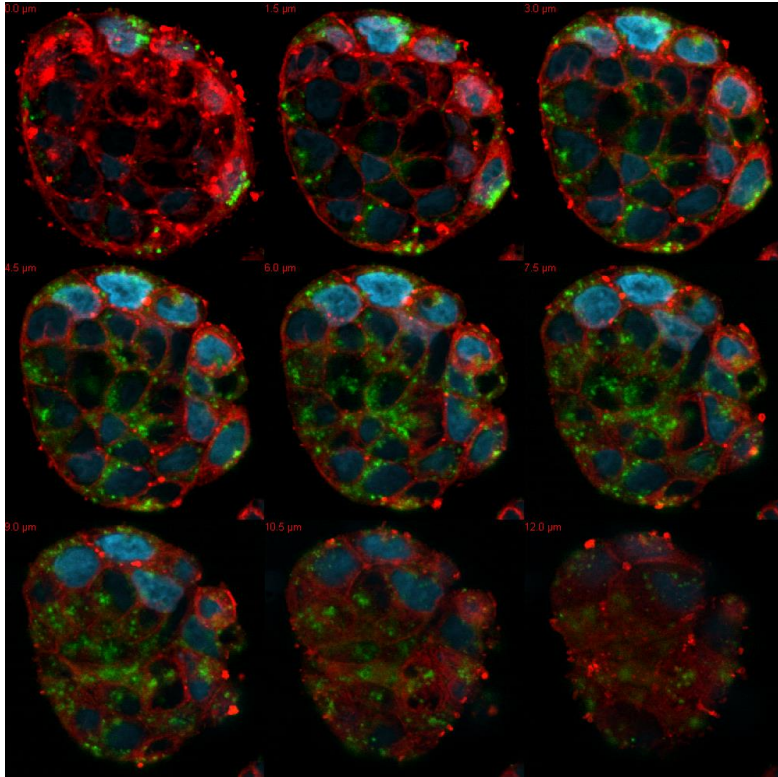

Green – FITC-RAMEB  
Blue – nucleus  
Red – cell membrane

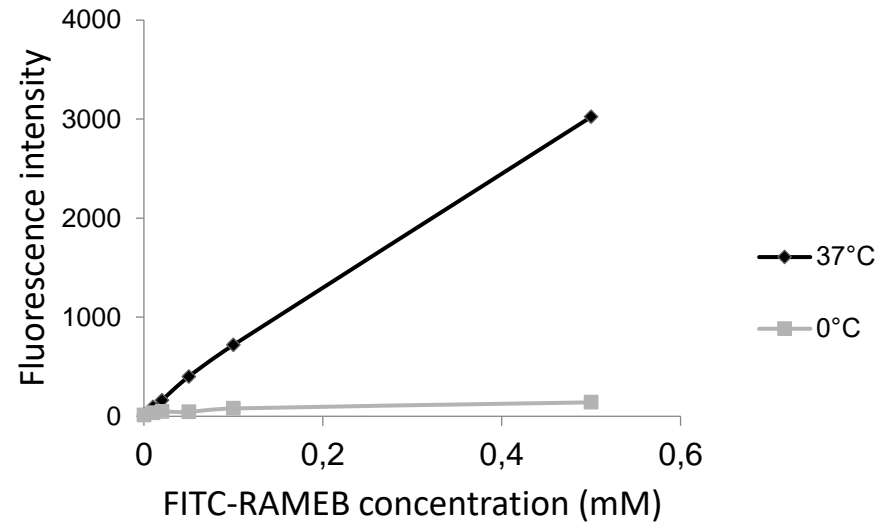

Fenyvesi F. et al., (2014) PLoS ONE 9(1): e84856.

# Intracellular FITC-RAMEB accumulation in Caco-2 cell layer

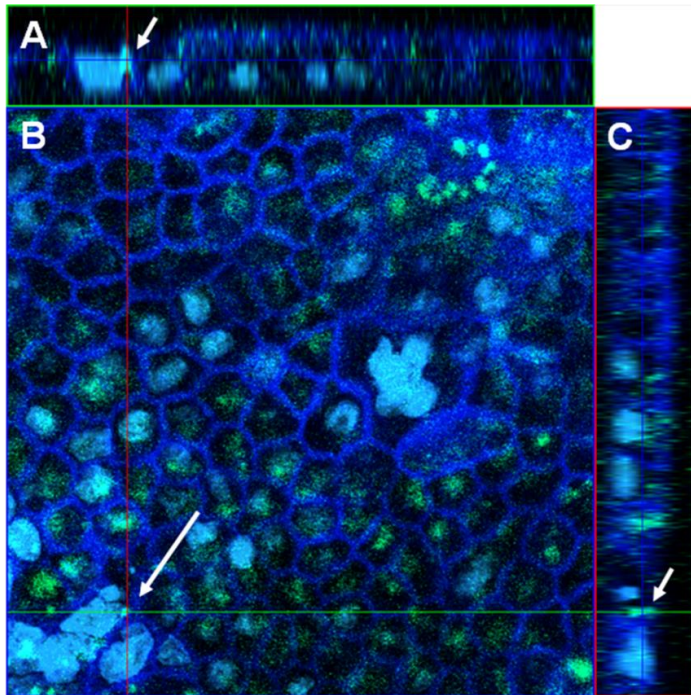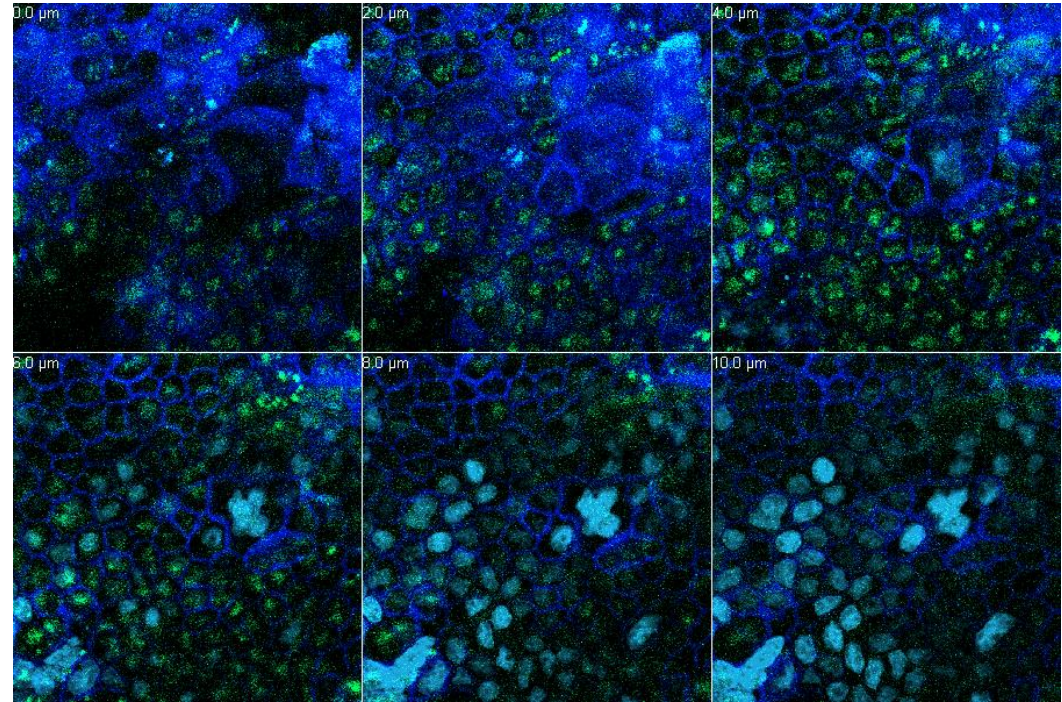

Green – FITC-RAMEB  
Pale Blue – nucleus  
Blue – cell membrane

# Intracellular localization of cyclodextrins

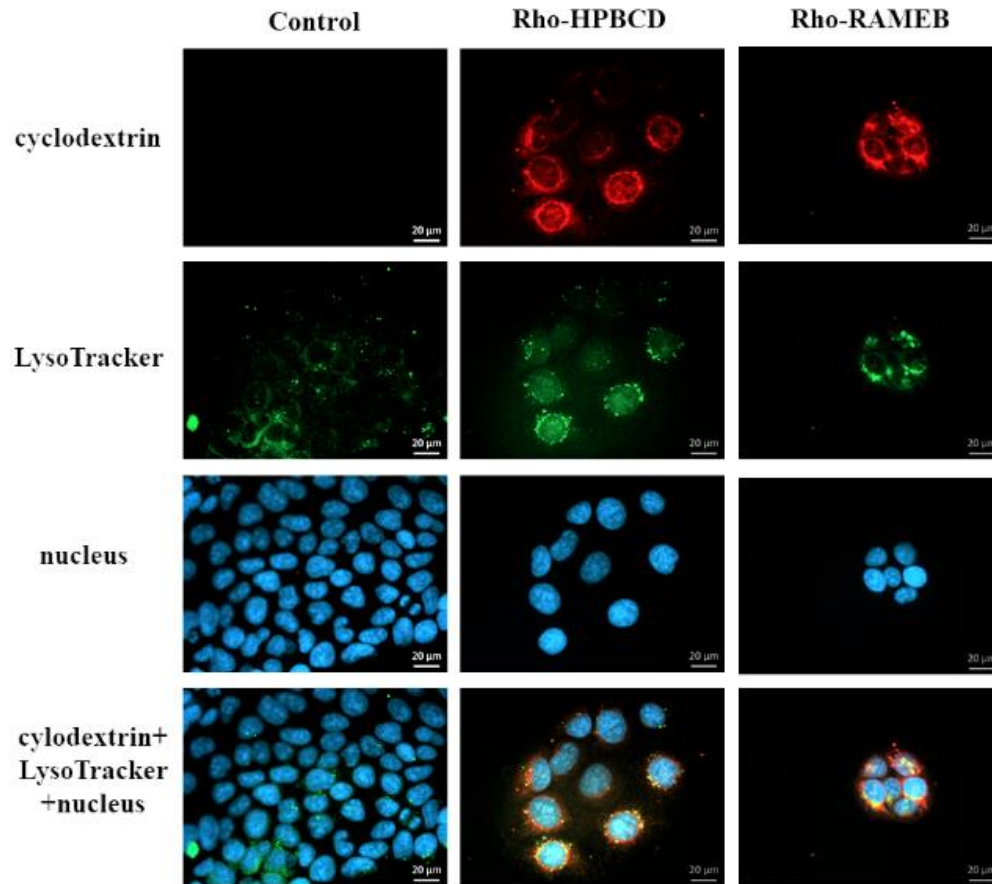

Detection of lysosomes  
by fluorescence microscopy  
in Caco-2 cells



# Intracellular FITC-HPBCD accumulation in different cell lines

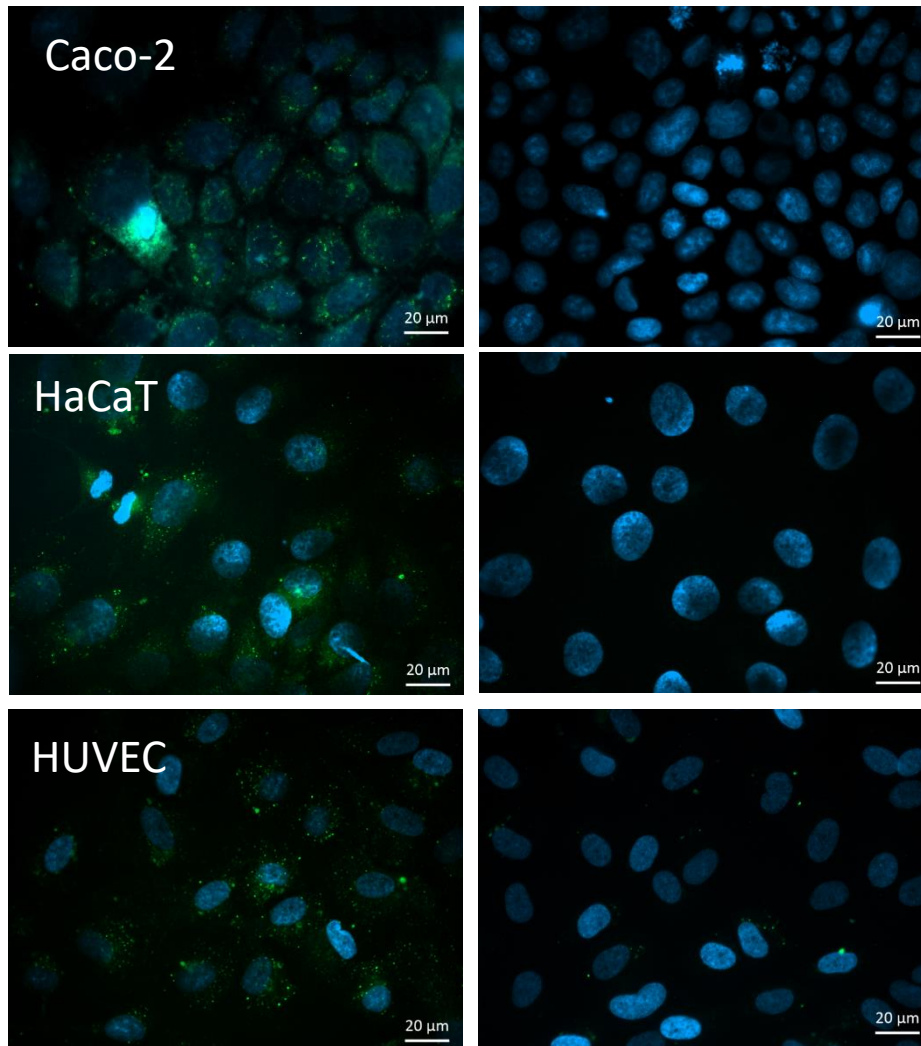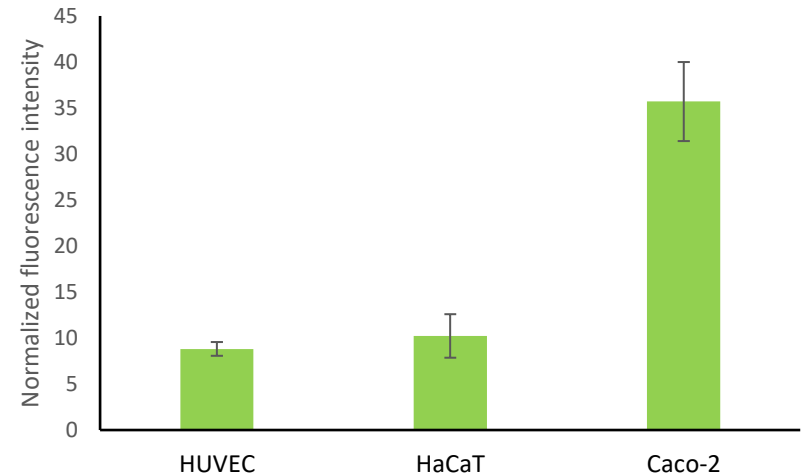

50  $\mu\text{M}$ , 30 min, 37  $^{\circ}\text{C}$ , flow cytometry

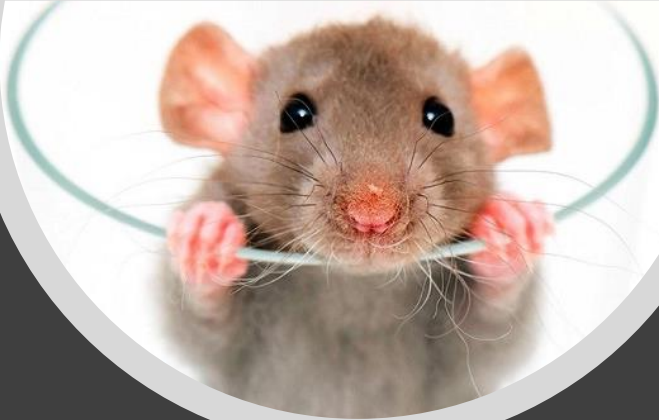

IECP  
2020

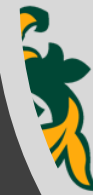

UNIVERS  
DEBRE

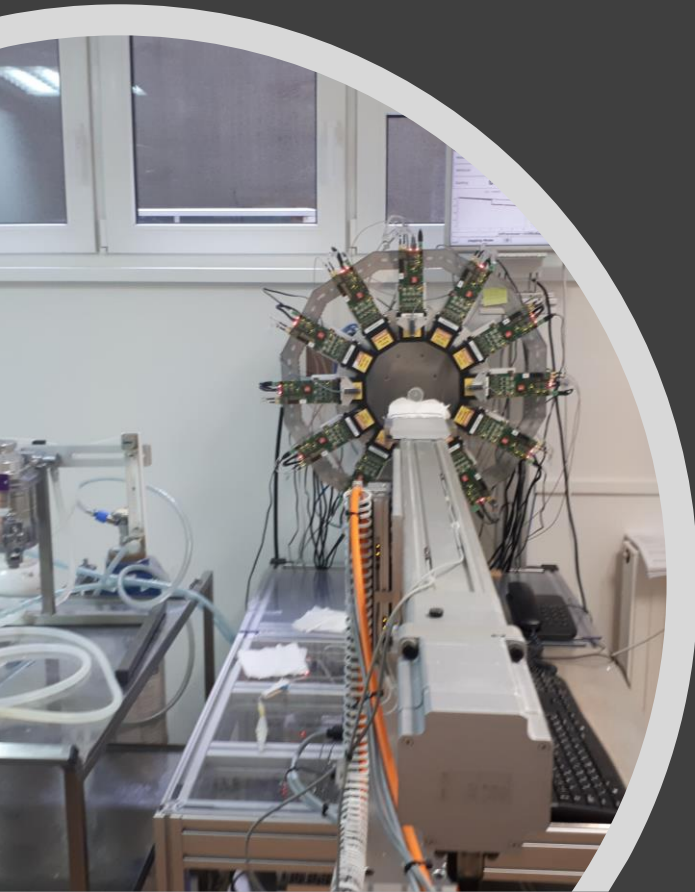

## 2. *In vivo* biological studies

# Chemical synthesis and radiolabeling of $^{68}\text{Ga}$ -labeled **NODAGA-HPBCD**

## Synthesis

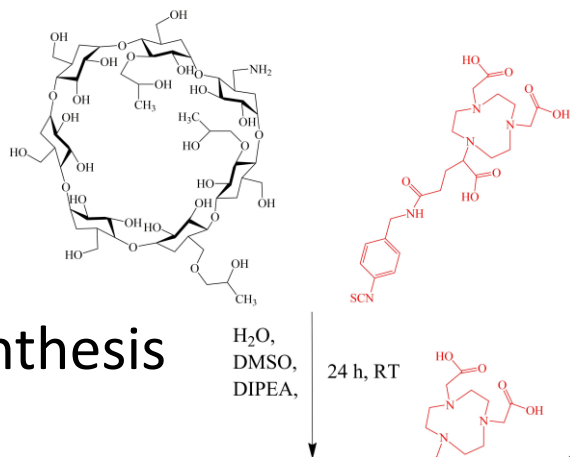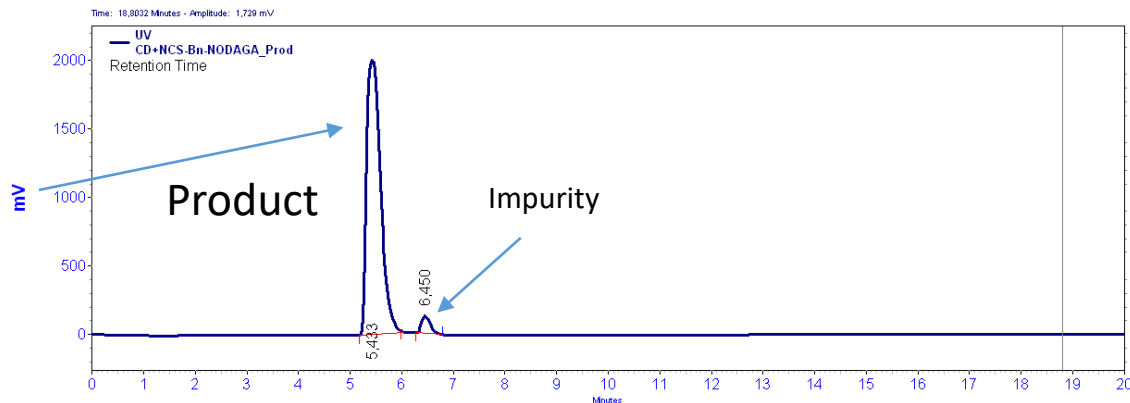

## $^{68}\text{Ga}$ -labeling

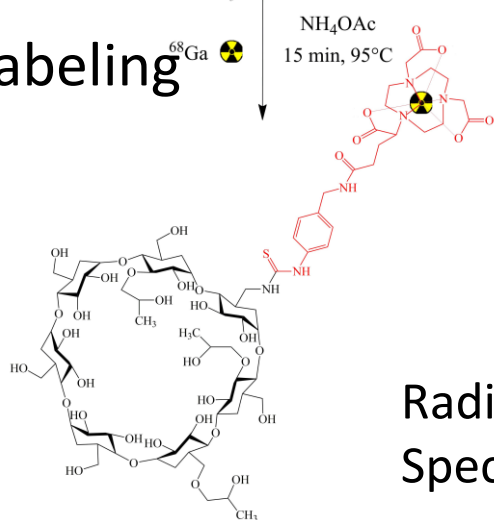

Purification by preparative RP-HPLC  
- Purity > 98% (HPLC)

Radiochemical purity > 98% (=HPLC)  
Specific activity was  $17.62 \pm 2.43 \text{ GBq}/\mu\text{mol}$



# *In vivo* PET imaging

BALB/c mice,  $6.3 \pm 0.2$  MBq of  $^{68}\text{Ga}$ -NODAGA-HPBCD i.v.

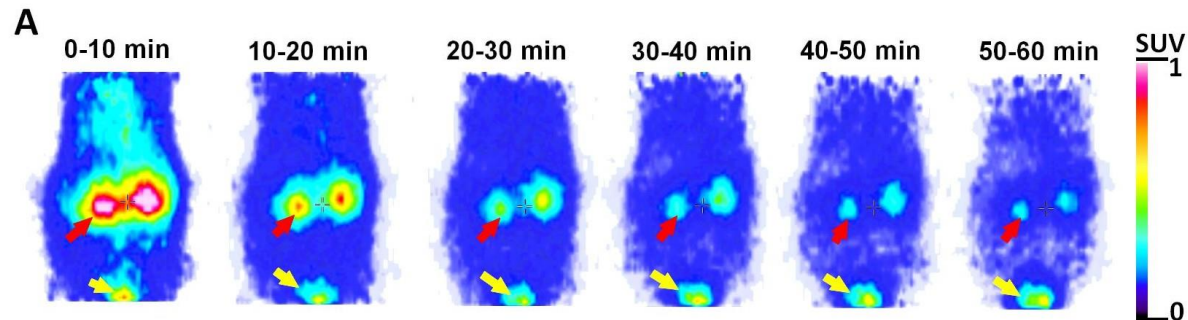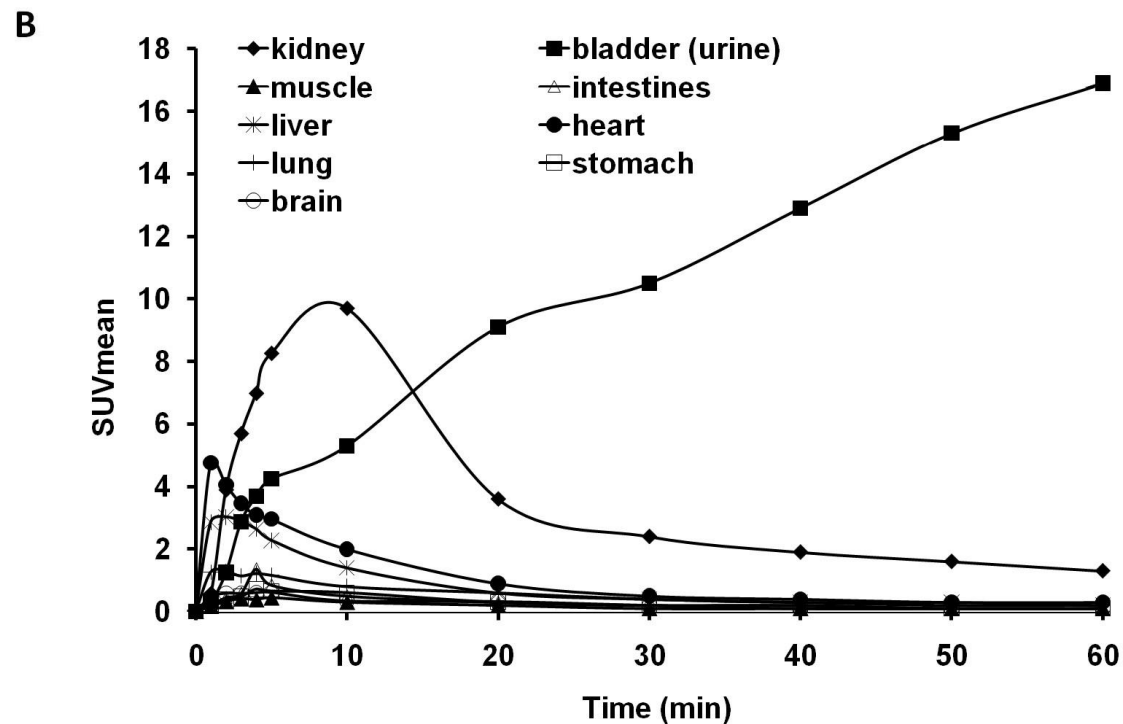

## BRAIN

10 min post injection

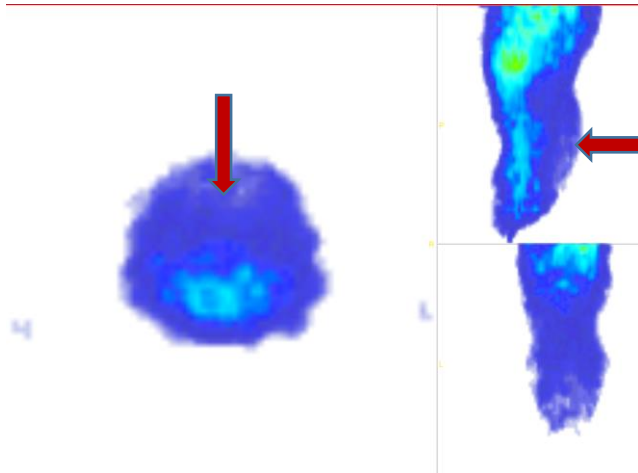

15 min post injection

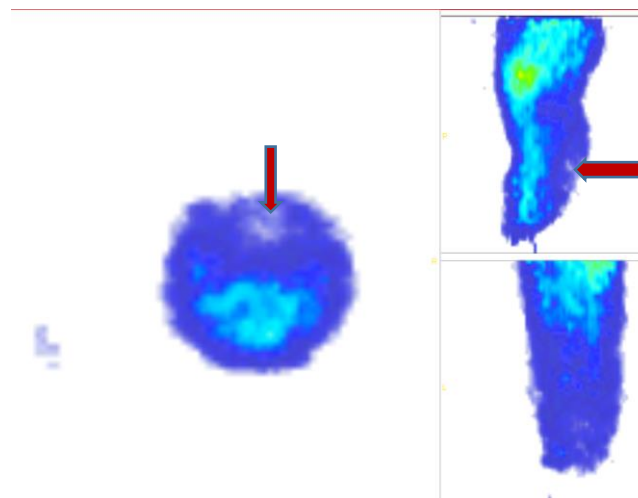

## PET/CT 90 min

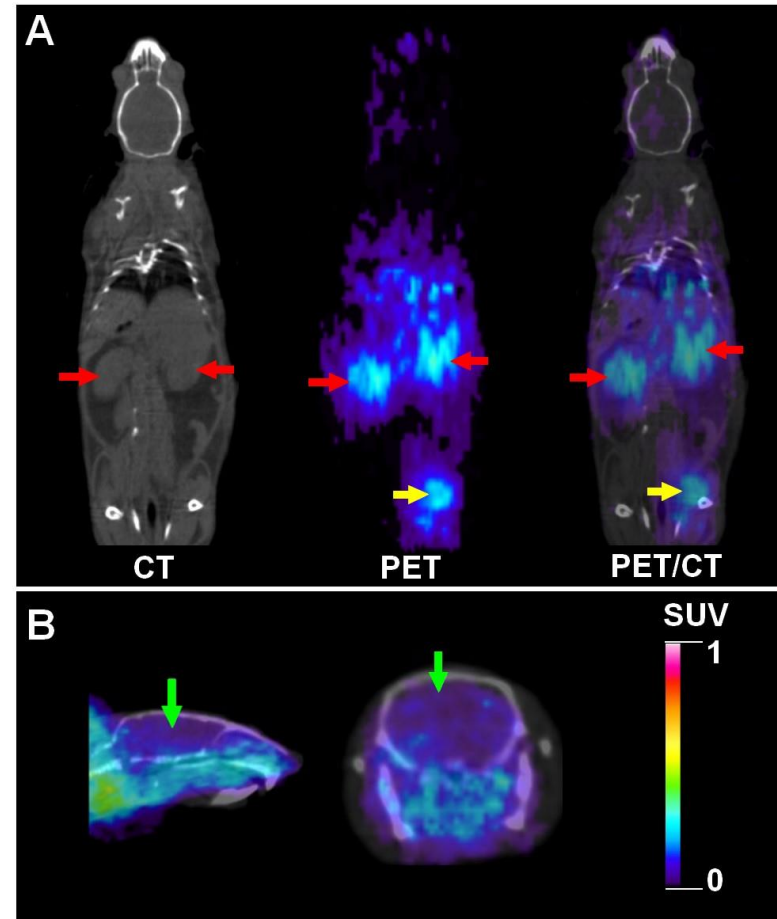

*Ex vivo*  
biodistribution studies  
NODAGA-HPBCD

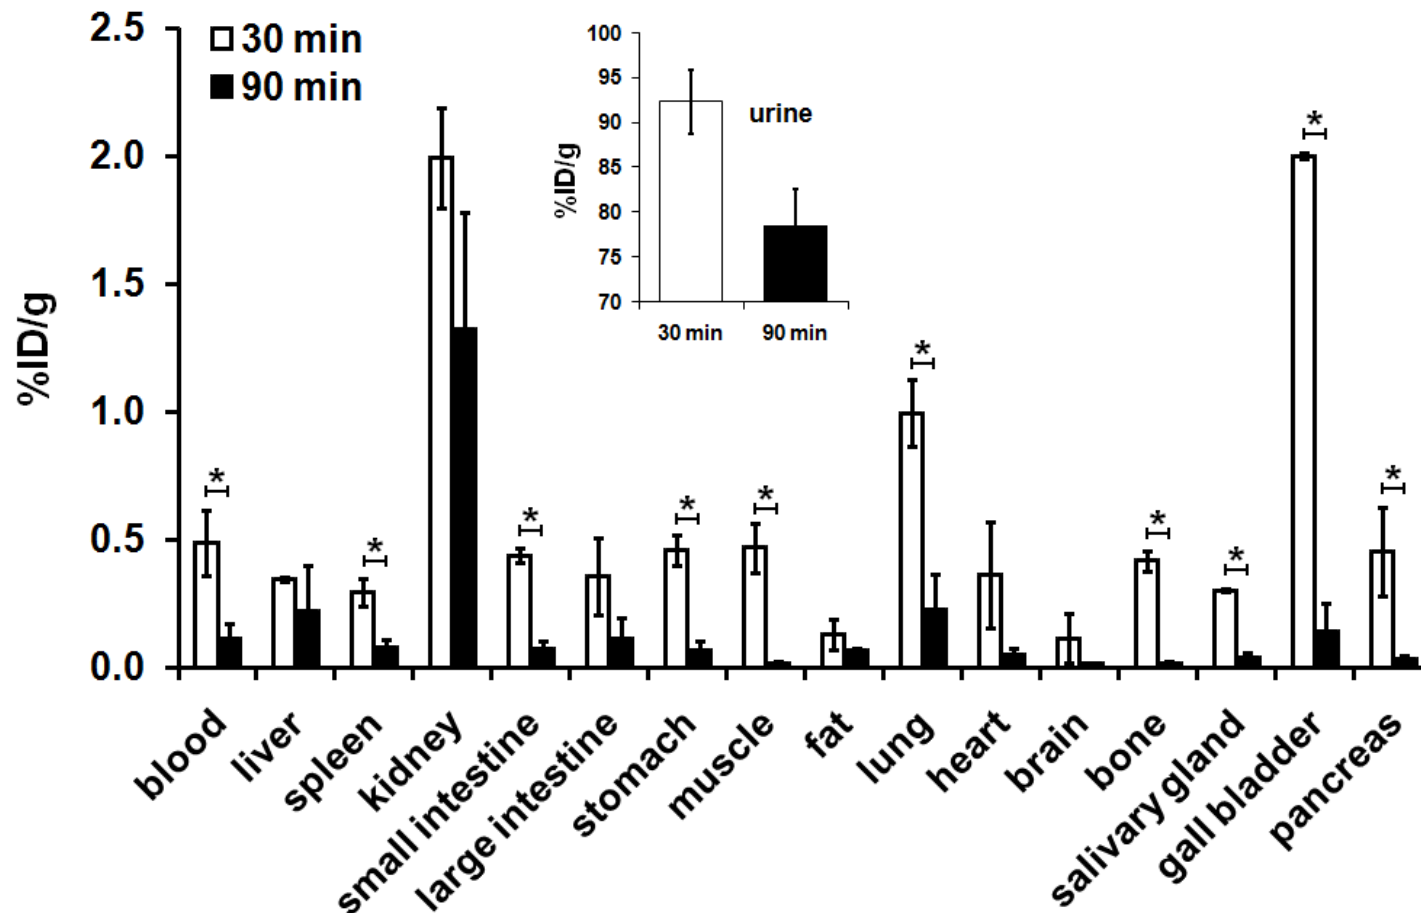

6-deoxy-6-monoamino-RAMEB

p-NCS-Bn-NODAGA

# Chemical synthesis and radiolabeling of $^{68}\text{Ga}$ labeled **NODAGA-RAMEB**

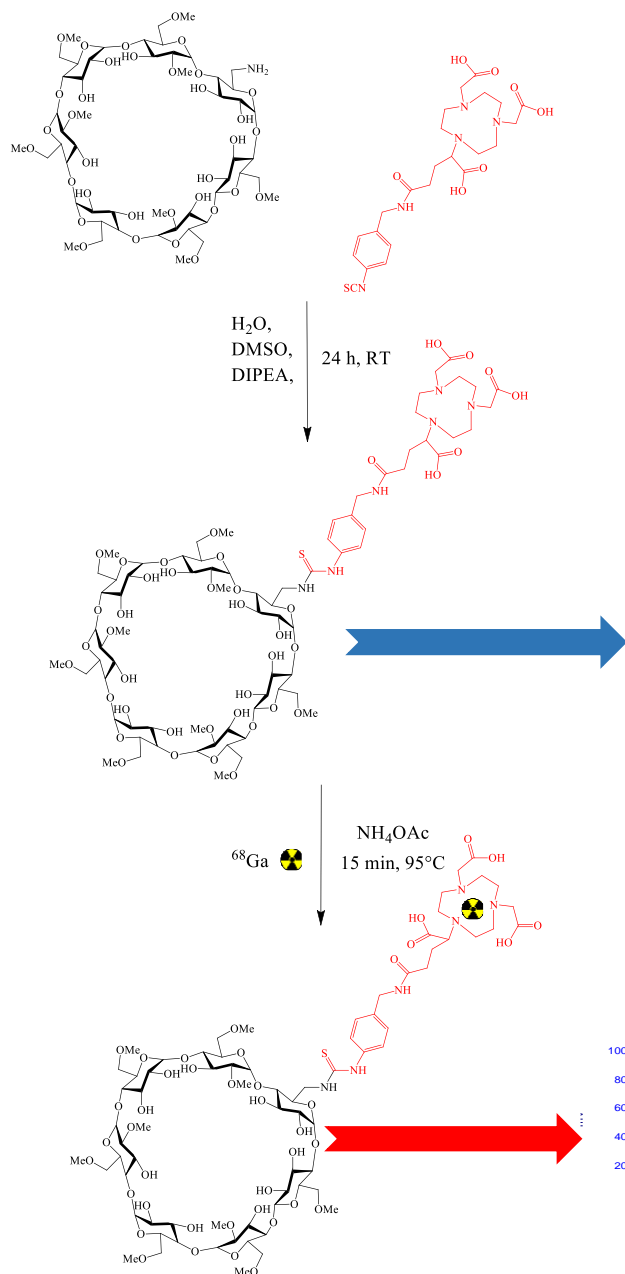

HPLC chromatogram (UV) of HPLC purified NODAGA functionalized RAMEB (NODAGA-RAMEB)

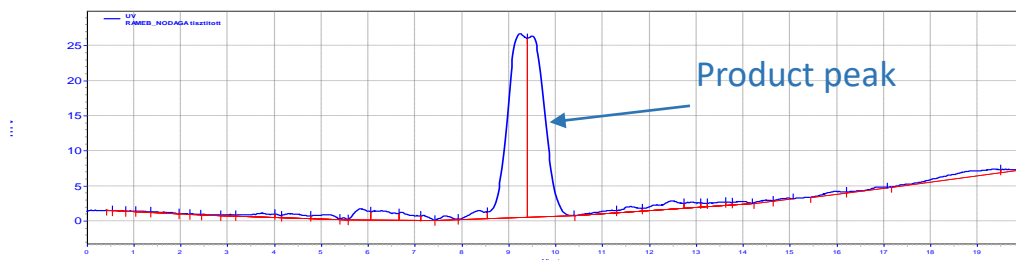

Radio HPLC chromatogram of  $^{68}\text{Ga}$ -labeled NODAGA-RAMEB ( $^{68}\text{Ga}$ -NODAGA-RAMEB)

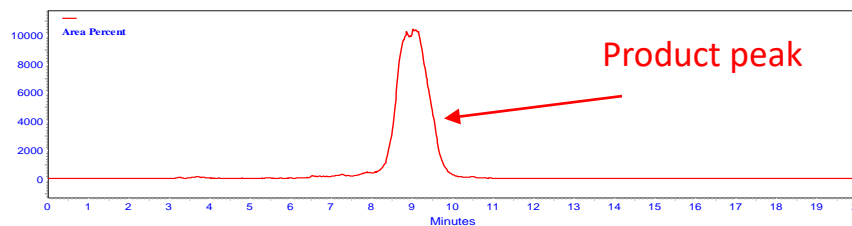



**A**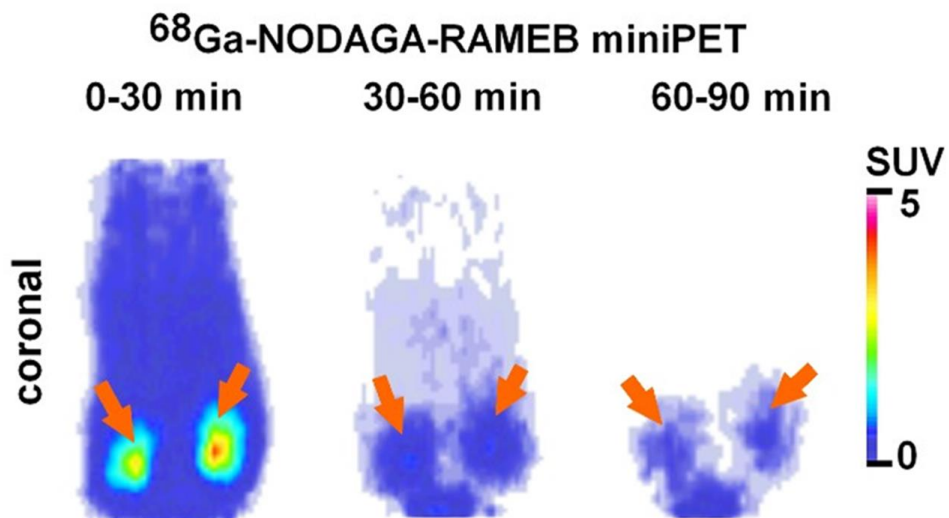**B**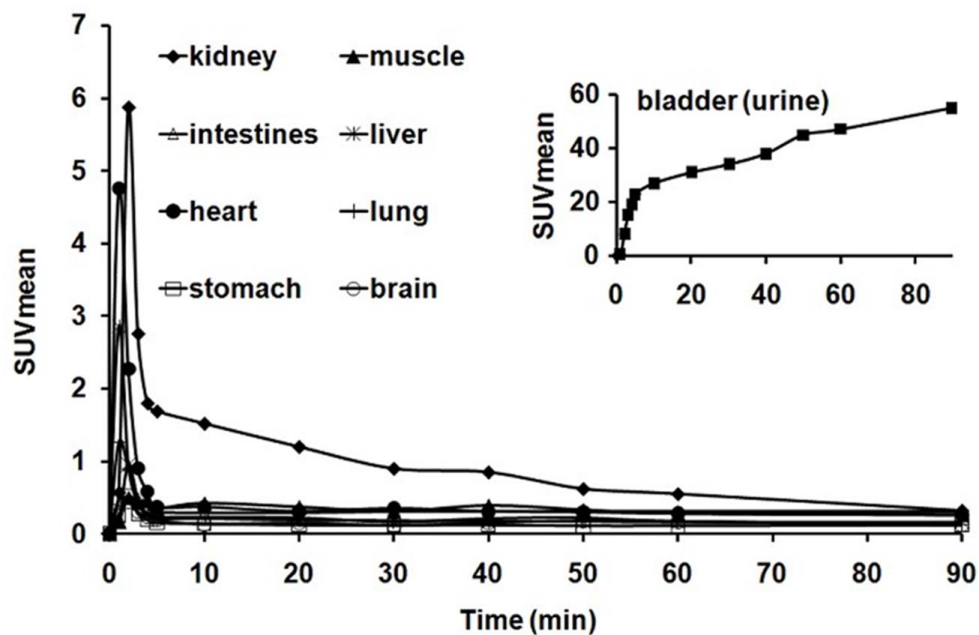

# *Ex vivo* biodistribution - $^{68}\text{Ga}$ -NODAGA-RAMEB

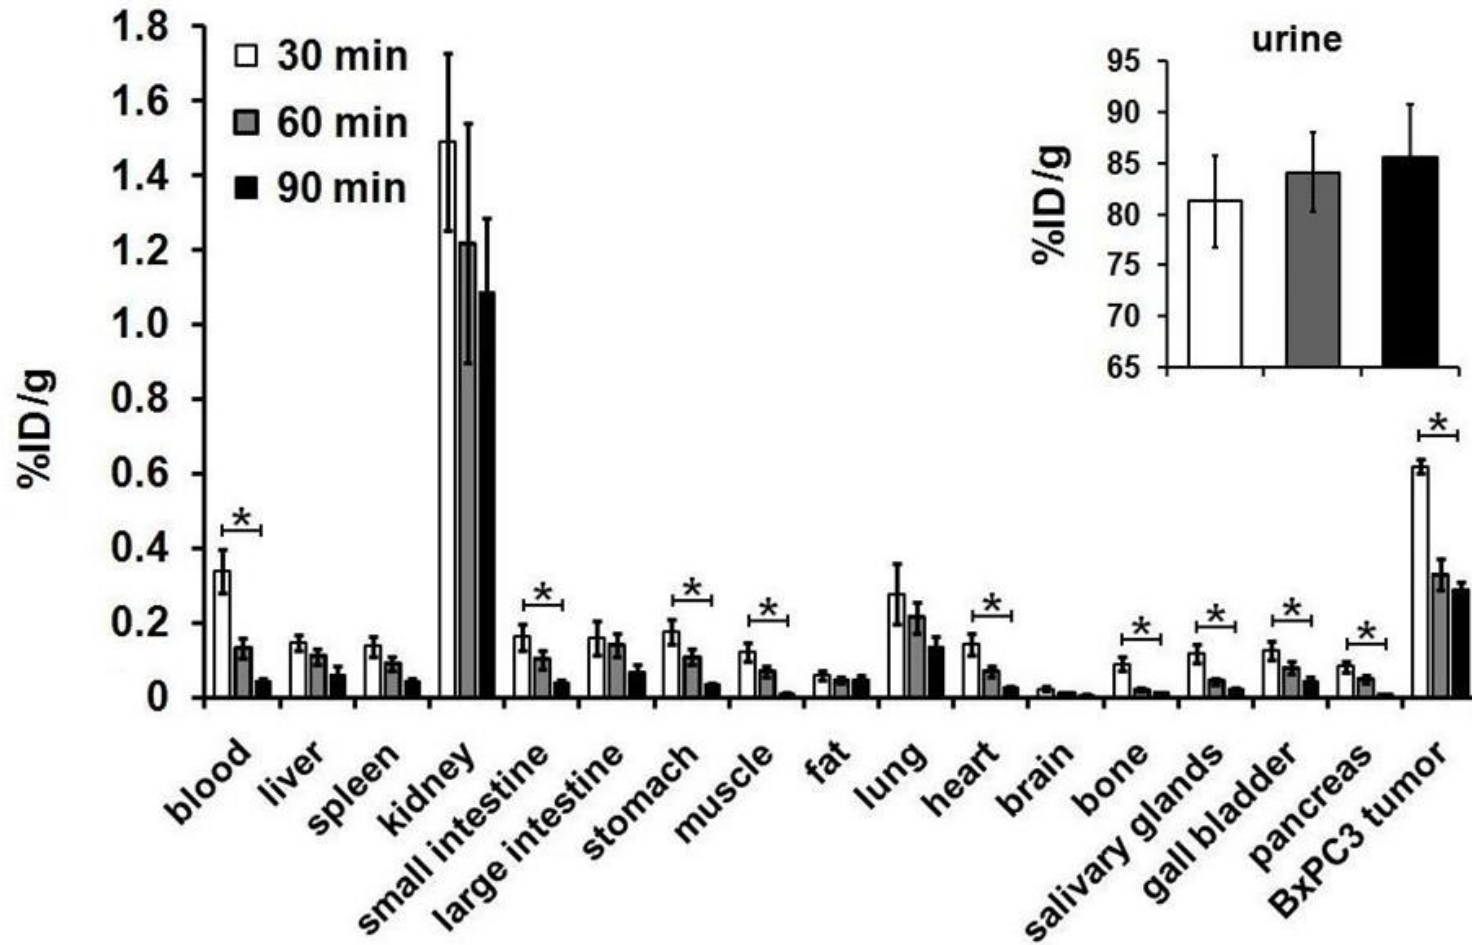

## BxPC3

High expression of  
Prostaglandin E2 Receptor  
(EP2)

**A**

$^{68}\text{Ga}$ -NODAGA-RAMEB miniPET  
80-90 min

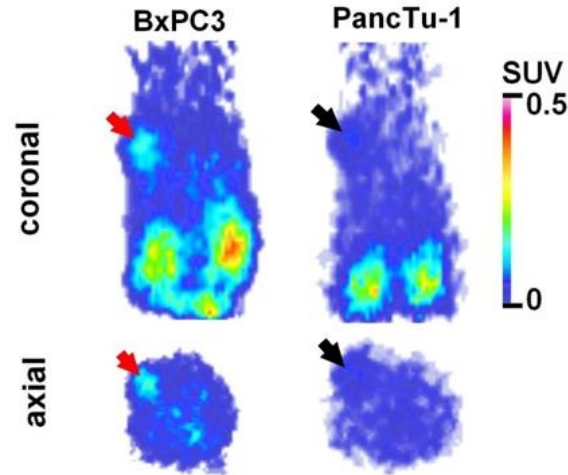

## PancTu-1

Low expression of  
Prostaglandin E2 Receptor  
(EP2)

**B**

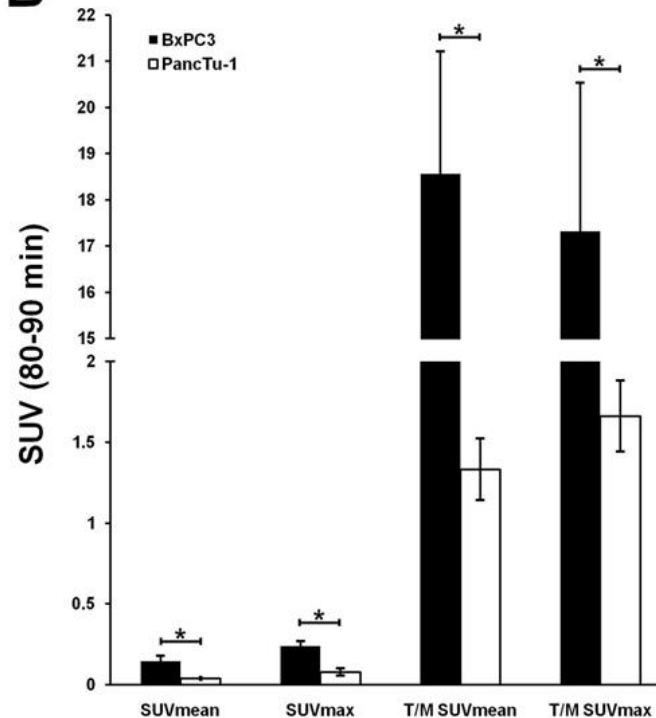

SUV - standardized uptake value  
T/M - tumor-to-muscle (background) ratio

# Conclusions

- Cyclodextrins interact with biomolecules at different levels of biological systems
- Cyclodextrins enter the cytoplasm of different cell lines by endocytosis
- $^{68}\text{Ga}$ -labeled NODAGA-HPBCD and RAMEB have fast elimination and limited tissue distribution
- Unexpected distribution in the lung- but in accordance with toxicity data
- No uptake to the brain after i.v. administration
- Unexpected  $^{68}\text{Ga}$ -labeled NODAGA-RAMEB tumor accumulation in PGE2 positive tumors



# Thank you for your kind attention!

## Acknowledgments

- Cyclolab Ltd. Budapest, Hungary
- Ágnes Rusznyák and Katalin Réti-Nagy
- György Trencsényi, István Hajdu, Division of Nuclear Medicine and Translational Imaging, Department of Medical Imaging, Faculty of Medicine, University of Debrecen

This study was supported by FK\_17 (FK124634) research grant of the National Research, Development and Innovation Office, Budapest, Hungary and by the János Bolyai Research Scholarsip of the Hungarian Academy of Sciences (BO/00290/16).
